# Supplementary material for: Polymerization-induced self-assembly of PVAc-b-PVDF block copolymers via RAFT dispersion polymerization of vinylidene fluoride in dimethyl carbonate
Source: Royal Society of Chemistry journal article supplement (doi:10.1039/c6py02203k), 2017-01-01
Supplement: c6py02203k1.pdf [file c6py02203k1.pdf]

# Polymerization-induced Self-Assembly of PVAc-*b*- PVDF block copolymers via RAFT dispersion polymerization of VDF in dimethylcarbonate

*Marc Guerre,<sup>a</sup> Mona Semsarilar,<sup>b</sup> Franck Godiard,<sup>c</sup> Bruno Améduri,<sup>a</sup> Vincent Ladmiral<sup>†\*</sup>*

<sup>a</sup>*Institut Charles Gerhardt Montpellier UMR5253 CNRS-UM-ENSCM – Equipe Ingénierie et Architectures Macromoléculaires, ENSCM 8, rue de l'école normale, 34296 cedex 5, Montpellier, France.*

<sup>b</sup>*Institut Européen des Membranes, IEM, UMR-5635, Université de Montpellier, ENSCM, CNRS, Place Eugène Bataillon, 34095 Montpellier cedex 5, France.*

<sup>c</sup>*Service de Microscopie Electronique, Université de Montpellier, Place Eugène Bataillon, 34095 Montpellier cedex 5, France.*

SUPPORTING INFORMATION

## Equations used to determine the degree of polymerization and molar masses of PVAc macro-CTAs

$$(S1) DP_{PVAc} = \frac{\int_{4.76}^{5.14} CH(OAc) + \frac{1}{2} \int_{3.18}^{3.51} -CH_2 - XA + \frac{1}{2} \int_{3.95}^{4.13} -CH(OAc) - H + \int_{6.50}^{6.70} -CH(OAc) - XA}{\frac{1}{3} \int_{1.37}^{1.46} -CH_3 (R - CTA)}$$

$$(S2) M_{n,theo} = \frac{[VAc]_0}{[CTA]_0} \times Yield \times M_{n,VAc} + M_{n,CTAXA}$$

$$(S3) M_{n,PVAc-XA} = M_{n,CTAXA} + DP \times M_{n,VAc}$$

With  $M_{n,VAc} = 86.09$  g/mol, and  $M_{n,CTAXA} = 208.29$  g/mol.

## Equations used to determine the proportions of the polymers chain ends:

### 1) PVDF:

$$(S4) (\%) PVDF_T - XA = \frac{\frac{1}{2} \int_{4.02}^{4.17} -CF_2 - CH_2 - XA}{\frac{1}{2} \int_{3.26}^{3.52} -CH_2 - CF_2 - XA + \int_{6.01}^{6.48} -CH_2 - CF_2H + \frac{1}{2} \int_{4.02}^{4.17} -CF_2 - CH_2 - XA + \frac{1}{3} \int_{1.71}^{1.87} -CF_2 - CH_3}$$

$$(S5) (\%) PVDF_H - XA = \frac{\frac{1}{2} \int_{3.26}^{3.52} -CH_2 - CF_2 - XA}{\frac{1}{2} \int_{3.26}^{3.52} -CH_2 - CF_2 - XA + \int_{6.01}^{6.48} -CH_2 - CF_2H + \frac{1}{2} \int_{4.02}^{4.17} -CF_2 - CH_2 - XA + \frac{1}{3} \int_{1.71}^{1.87} -CF_2 - CH_3}$$

$$(S6) (\%) PVDF_{H+T} - H = \frac{\int_{6.01}^{6.48} -CH_2 - CF_2H + \frac{1}{3} \int_{1.71}^{1.87} -CF_2 - CH_3}{\frac{1}{2} \int_{3.26}^{3.52} -CH_2 - CF_2 - XA + \int_{6.01}^{6.48} -CH_2 - CF_2H + \frac{1}{2} \int_{4.02}^{4.17} -CF_2 - CH_2 - XA + \frac{1}{3} \int_{1.71}^{1.87} -CF_2 - CH_3}$$

### 2) PVAc:

$$(S7) (\%) -CH(OAc) - CH_2 - XA = \frac{\frac{1}{2} \int_{3.18}^{3.51} -CH(OAc) - CH_2 - XA}{\frac{1}{2} \int_{3.18}^{3.51} -CH(OAc) - CH_2 - XA + \frac{1}{2} \int_{3.95}^{4.13} -CH_2 - (OAc)CH_2 + \int_{6.50}^{6.70} -CH_2 - CH(OAc) - XA}$$

$$(S8) (\%) -CH_2 - CH(OAc) - XA = \frac{\int_{6.50}^{6.70} -CH_2 - CH(OAc) - XA}{\frac{1}{2} \int_{3.18}^{3.51} -CH(OAc) - CH_2 - XA + \frac{1}{2} \int_{3.95}^{4.13} -CH_2 - (OAc)CH_2 + \int_{6.50}^{6.70} -CH_2 - CH(OAc) - XA}$$

$$(S9) (\%) -CH_2 - (OAc)CH_2 = \frac{\frac{1}{2} \int_{3.95}^{4.13} -CH_2 - (OAc)CH_2}{\frac{1}{2} \int_{3.18}^{3.51} -CH(OAc) - CH_2 - XA + \frac{1}{2} \int_{3.95}^{4.13} -CH_2 - (OAc)CH_2 + \int_{6.50}^{6.70} -CH_2 - CH(OAc) - XA}$$

| Run | PVAc <sub>x</sub> -b-PVDF <sub>y</sub><br>X/Y<br>(precipitated BCP) | wt. %<br>(PVAc/PVDF)<br>crude | mol %<br>(PVAc/PVDF)<br>crude | wt. %<br>(PVAc/PVDF)<br>precipitated |
|-----|---------------------------------------------------------------------|-------------------------------|-------------------------------|--------------------------------------|
| 2   | 18/18                                                               | 85/15                         | 79/21                         | 57/43                                |
| 3   | 18/78                                                               | 51/49                         | 59/41                         | 24/76                                |
| 4   | 18/145                                                              | 31/69                         | 23/77                         | 14/86                                |
| 5   | 18/257                                                              | 16/84                         | 12/88                         | 9/91                                 |
| 7   | 115/502                                                             | 55/45                         | 52/48                         | 24/86                                |
| 9   | 96/205                                                              | 74/26                         | 67/33                         | 39/61                                |
| 10  | 96/303                                                              | 57/43                         | 48/52                         | 30/70                                |
| 11  | 96/442                                                              | 36/64                         | 29/71                         | 22/78                                |

**Table S1.** Weight and molar fractions of crude and precipitated PVAc-*b*-PVDF BCPs.

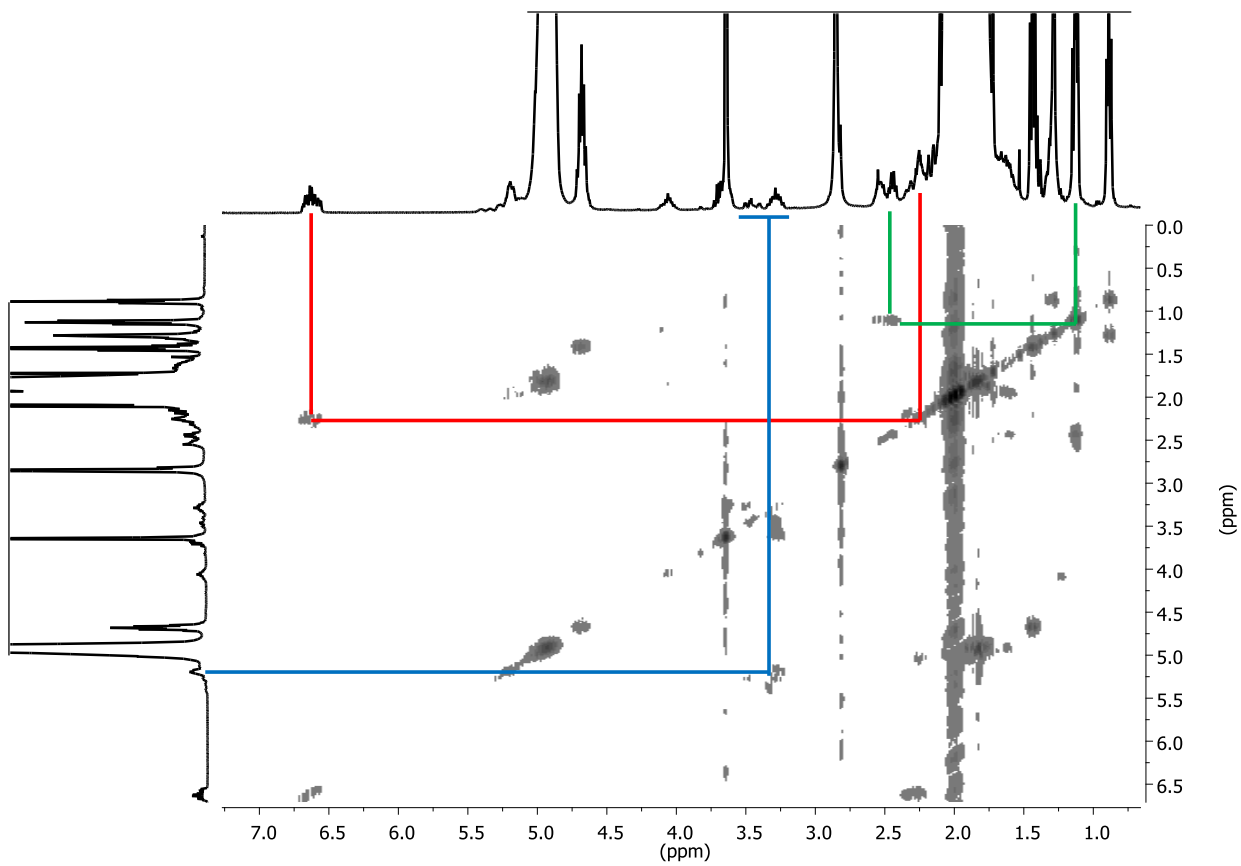

**Figure S1.** COSY  $^1\text{H}$ - $^1\text{H}$  NMR spectrum in  $(\text{CD}_3)_2\text{CO}$  of PVAc<sub>18</sub>-XA synthesized by RAFT polymerization (run 1 Table 1). The red line shows the  $-\text{CH}_2-(\text{CH}_3(\text{C}=\text{O})\text{OCH}-\text{XA})$  correlation (PVAc<sub>H</sub>-XA); the blue line shows the  $-\text{CH}(\text{O}(\text{C}=\text{O})\text{CH}_3)-\text{CH}_2-\text{XA}$  correlation (PVAc<sub>T</sub>-XA); the green line shows the  $\text{CH}_3\text{O}(\text{C}=\text{O})(\text{CH}_3)\text{CH}-$  correlation ( $\alpha$  chain end).

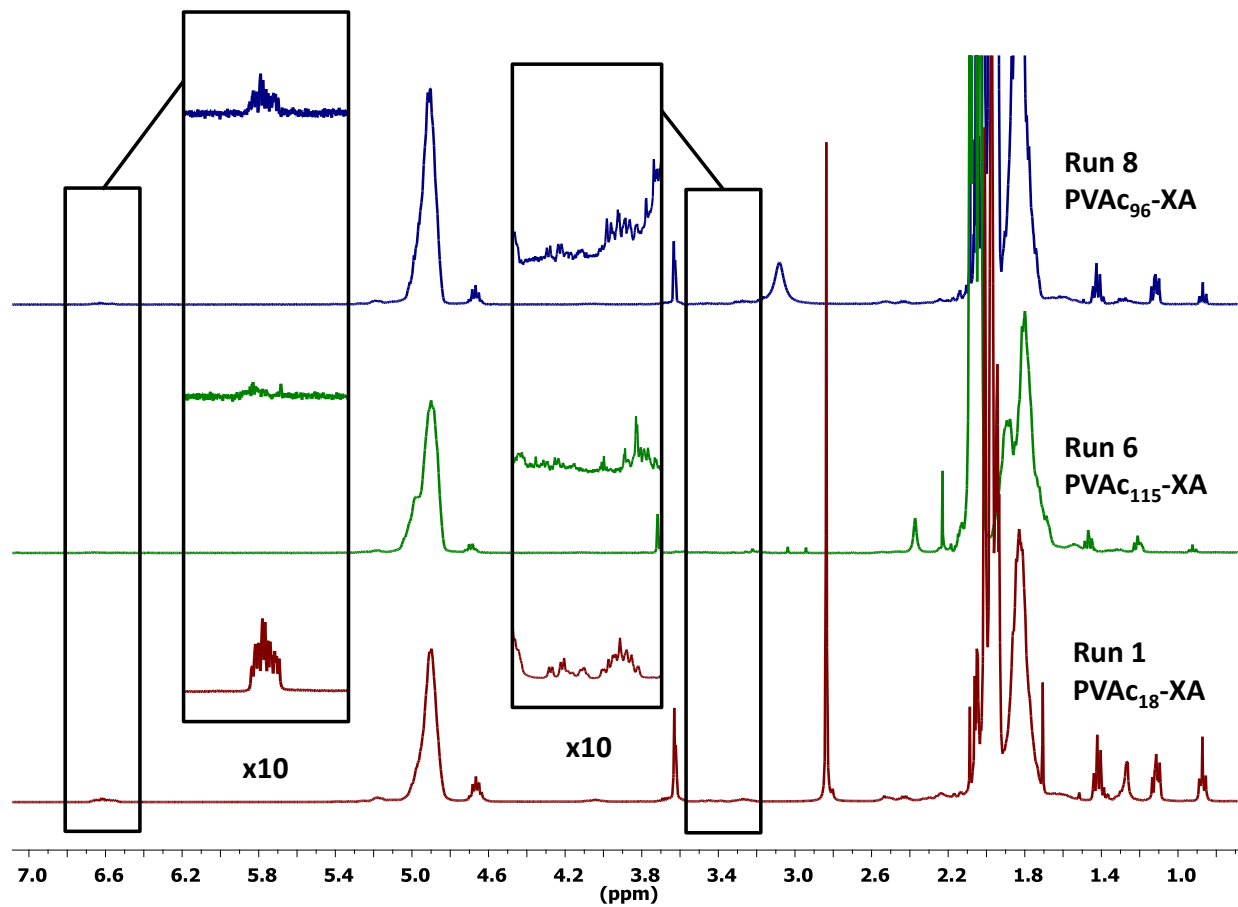

**Figure S2.** <sup>1</sup>H NMR spectrum in (CD<sub>3</sub>)<sub>2</sub>CO of PVAc<sub>18</sub>-XA (red, bottom, run 1 Table 1), PVAc<sub>115</sub>-XA (green, middle, run 6 Table 1), PVAc<sub>96</sub>-XA (blue, top, run 8 Table 1), synthesized by RAFT polymerization.

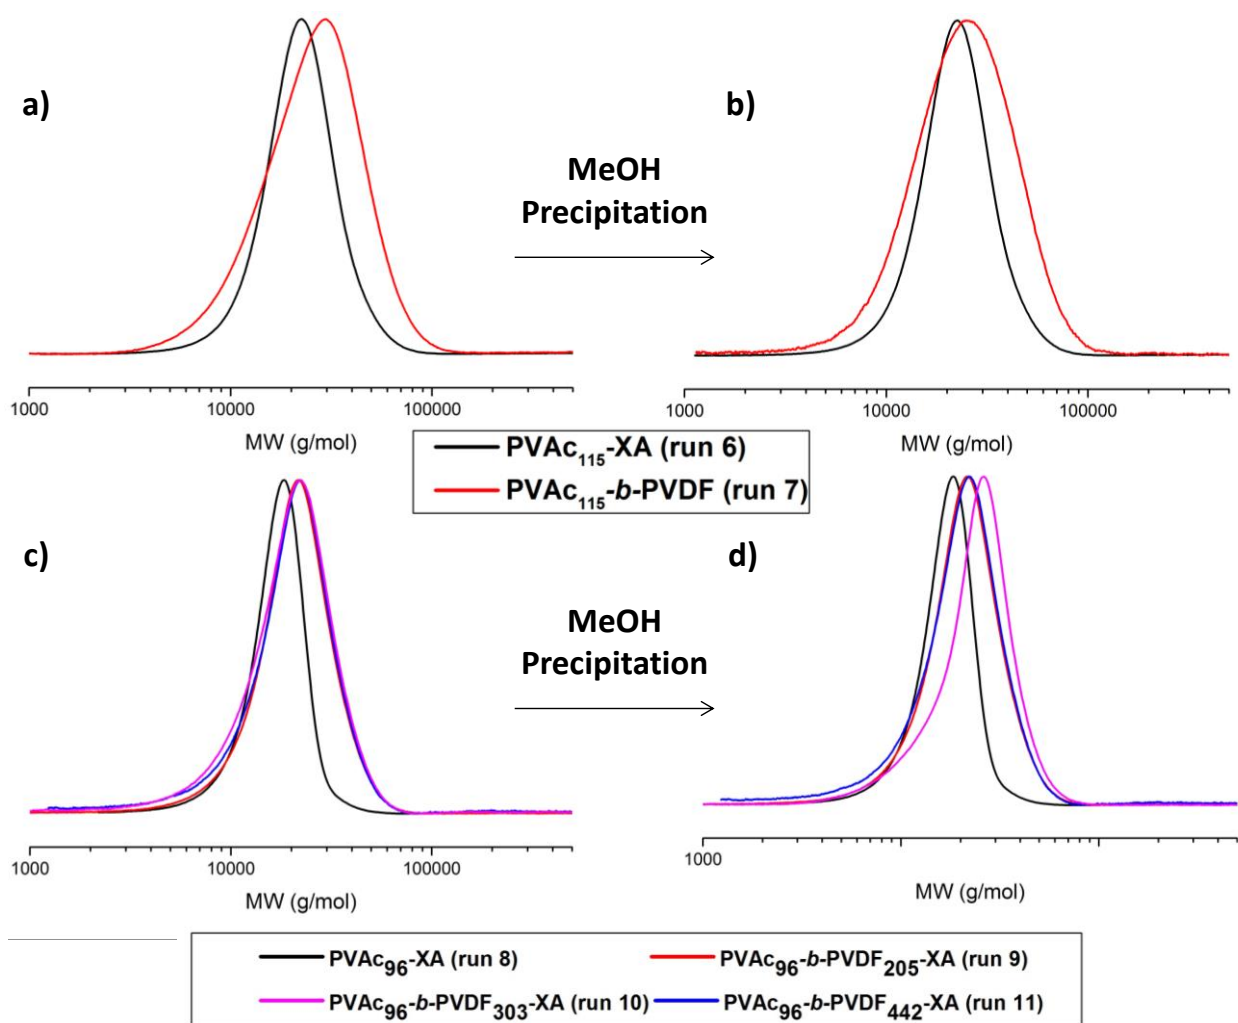

**Figure S3.** Normalized SEC traces (viscosimetric detector) of: a) PVAc<sub>115</sub>-XA and crude PVAc<sub>115</sub>-*b*-PVDF BCP; b) PVAc<sub>115</sub>-XA and PVAc<sub>115</sub>-*b*-PVDF BCP precipitated in methanol; c) PVAc<sub>96</sub>-XA and crude PVAc<sub>96</sub>-*b*-PVDF BCP; and d) PVAc<sub>96</sub>-XA and PVAc<sub>96</sub>-*b*-PVDF BCP precipitated in methanol.

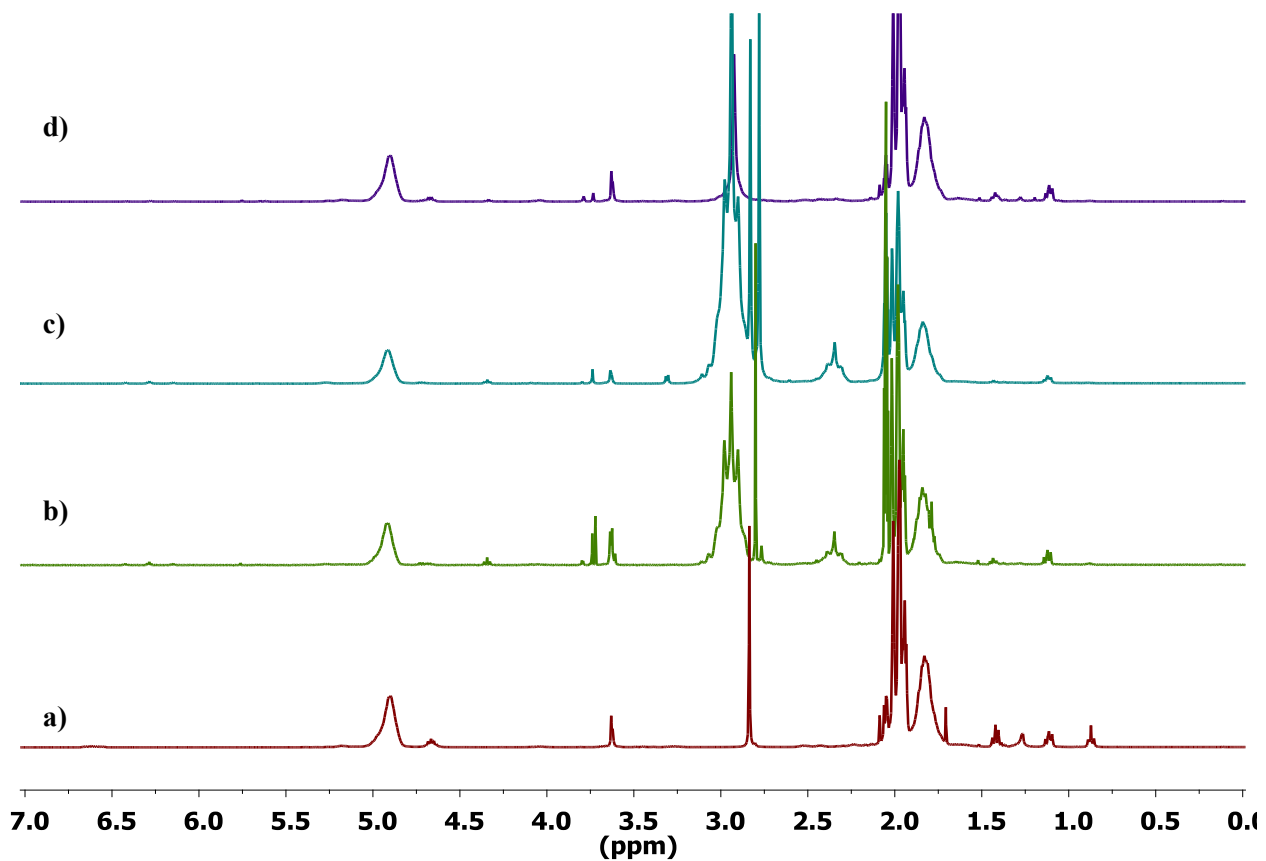

**Figure S4.** Full  $^1\text{H}$  NMR spectra in  $(\text{CD}_3)_2\text{CO}$  of a) PVAc<sub>18</sub>-XA (run 1, Table 1), b) PVAc<sub>18</sub>-*b*-PVDF<sub>78</sub> crude c) PVAc<sub>18</sub>-*b*-PVDF<sub>78</sub> precipitated in methanol (d) the methanol soluble fraction resulting from the precipitation of PVAc<sub>18</sub>-*b*-PVDF<sub>78</sub> in cold methanol.

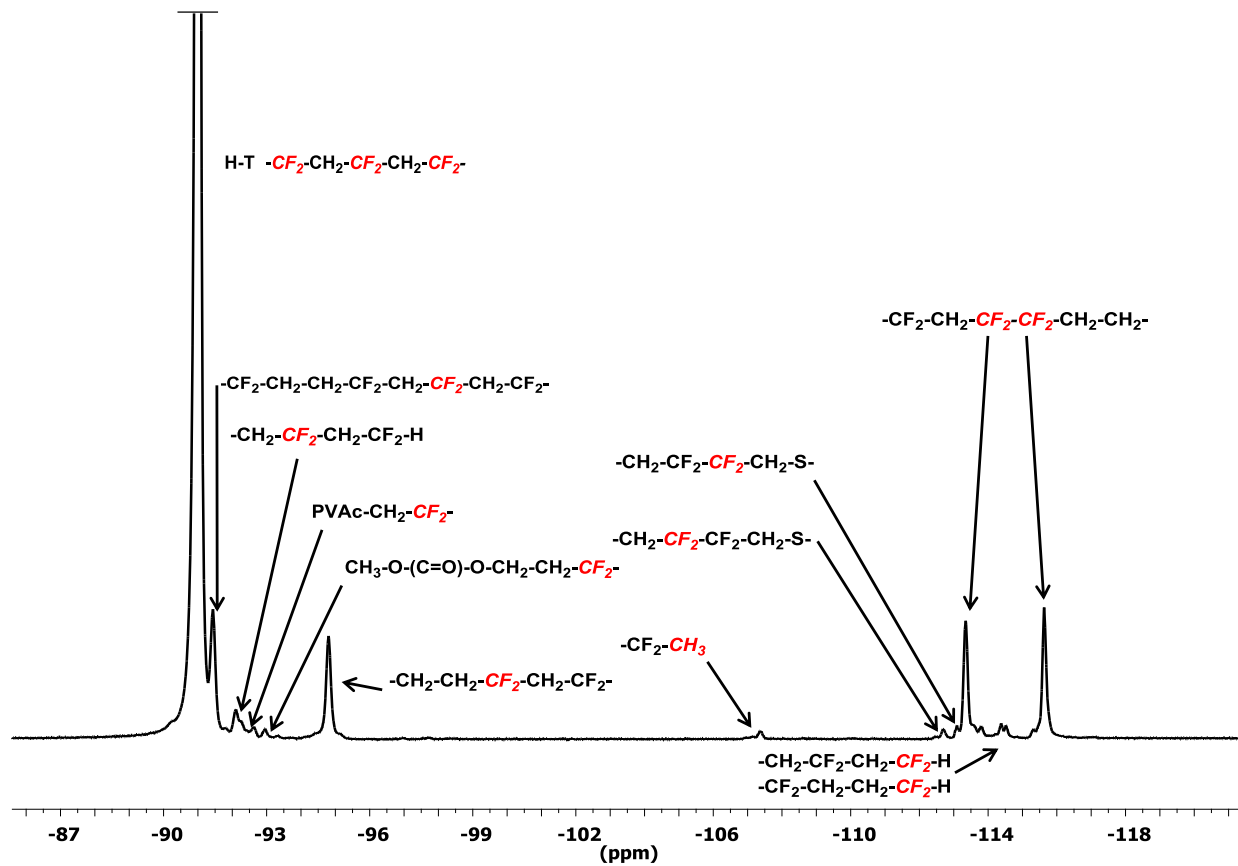

**Figure S5.**  $^{19}\text{F}$  NMR spectrum in  $(\text{CD}_3)_2\text{CO}$  of precipitated  $\text{PVAc}_{18}\text{-}b\text{-PVDF}_{78}$  BCP (run 3, Table 1).



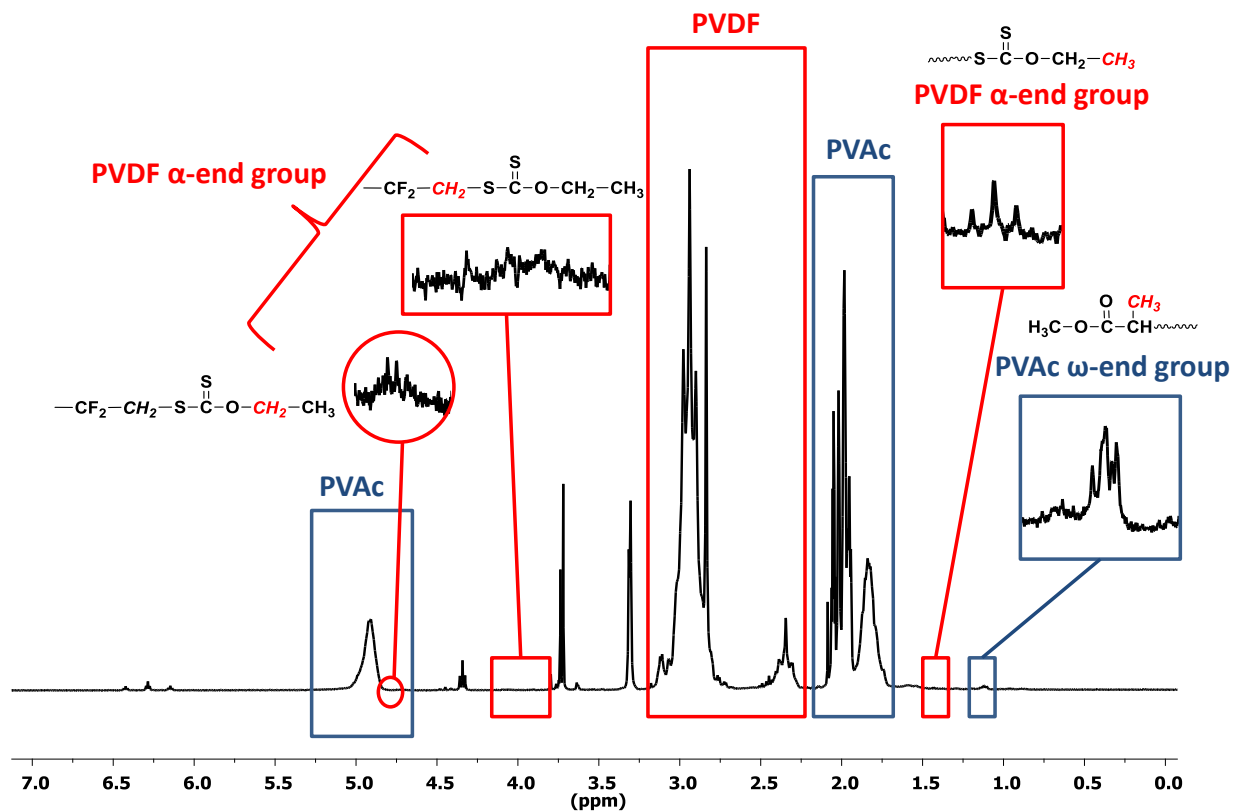

**Figure S6.**  $^1\text{H}$  NMR spectrum in  $(\text{CD}_3)_2\text{CO}$  of precipitated  $\text{PVAc}_{115}\text{-}b\text{-PVDF}_{502}$  BCP (run 7, Table 1).

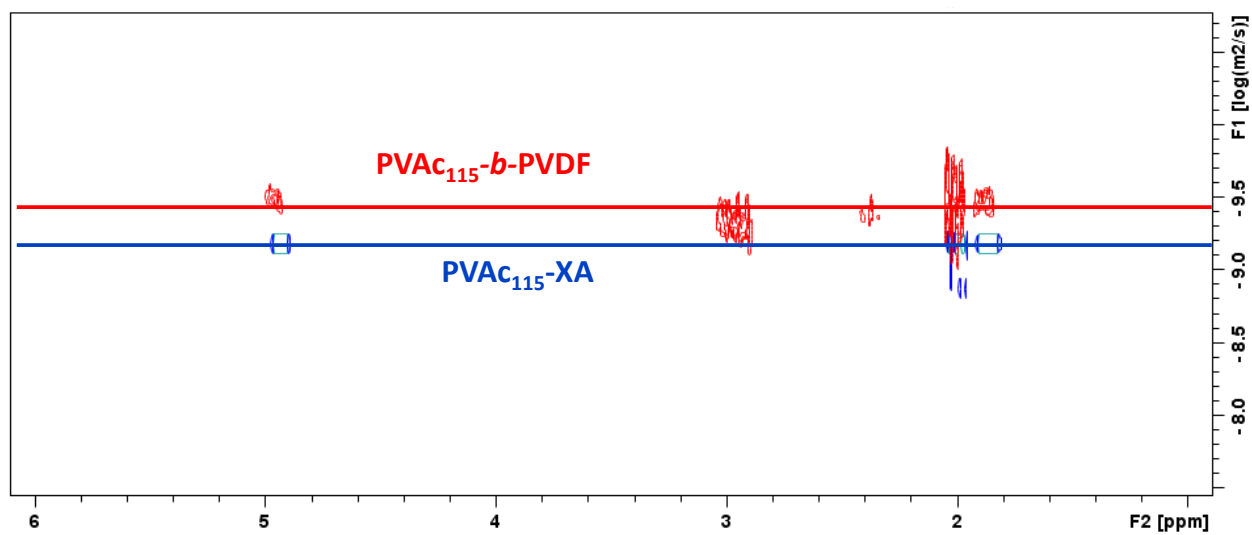

**Figure S7.** Superposed <sup>1</sup>H NMR DOSY spectra in (CD<sub>3</sub>)<sub>2</sub>CO of PVAc<sub>115</sub>-XA (run 6, Table 1, blue signal) and PVAc<sub>115</sub>-*b*-PVDF<sub>502</sub> BCP (run 7, Table 1, red signal).

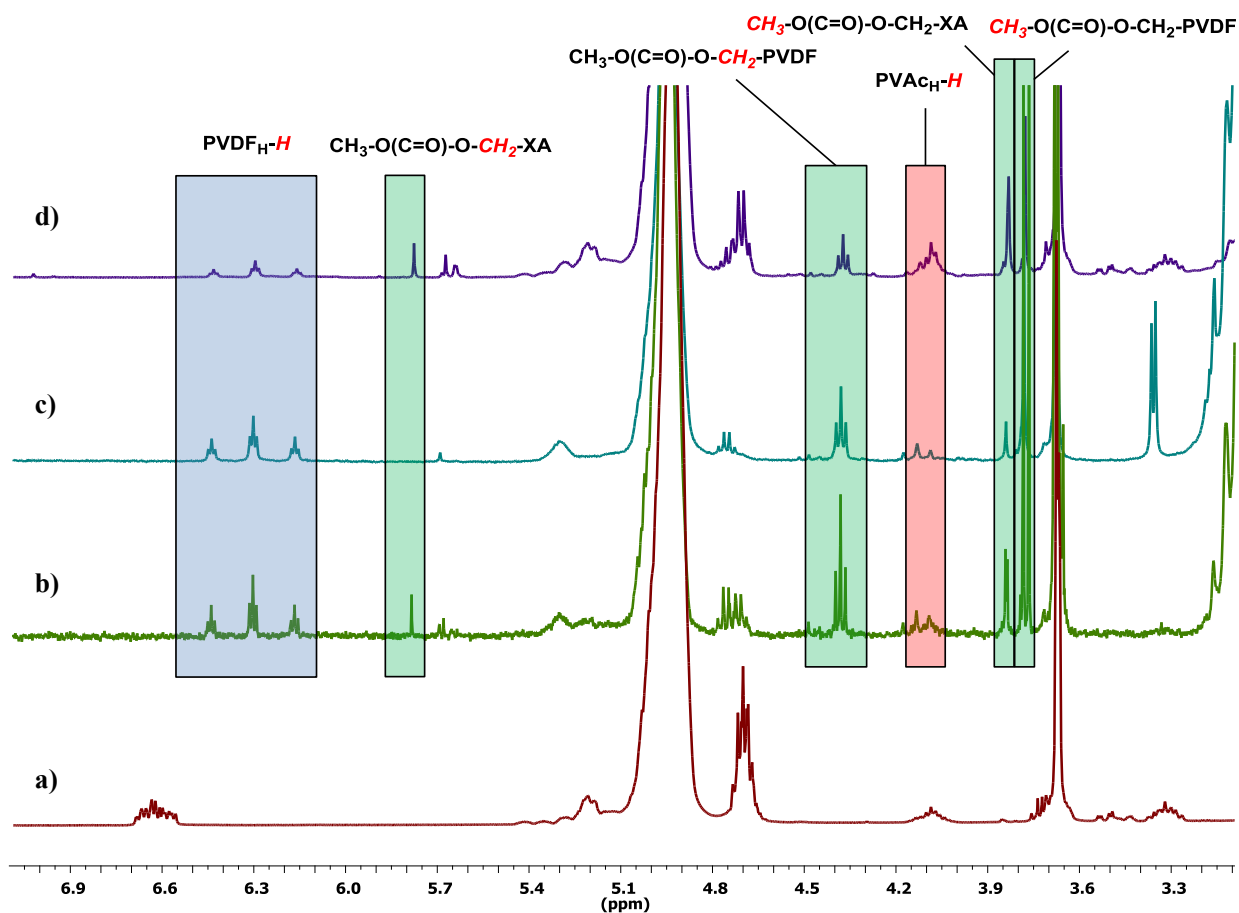

**Figure S8.** Expansion of the 3.05 to 7.1 ppm region of the  $^1\text{H}$  NMR spectra in  $(\text{CD}_3)_2\text{CO}$  of a) PVAc<sub>18</sub>-XA (run 1, Table 1), b) Crude PVAc<sub>18</sub>-*b*-PVDF<sub>78</sub> (run 3, Table 1) c) PVAc<sub>18</sub>-*b*-PVDF<sub>78</sub> (run 3, Table 1) precipitated in methanol (d) the methanol soluble fraction resulting from the precipitation of PVAc<sub>18</sub>-*b*-PVDF<sub>78</sub> (run 3, Table 1) in cold methanol.

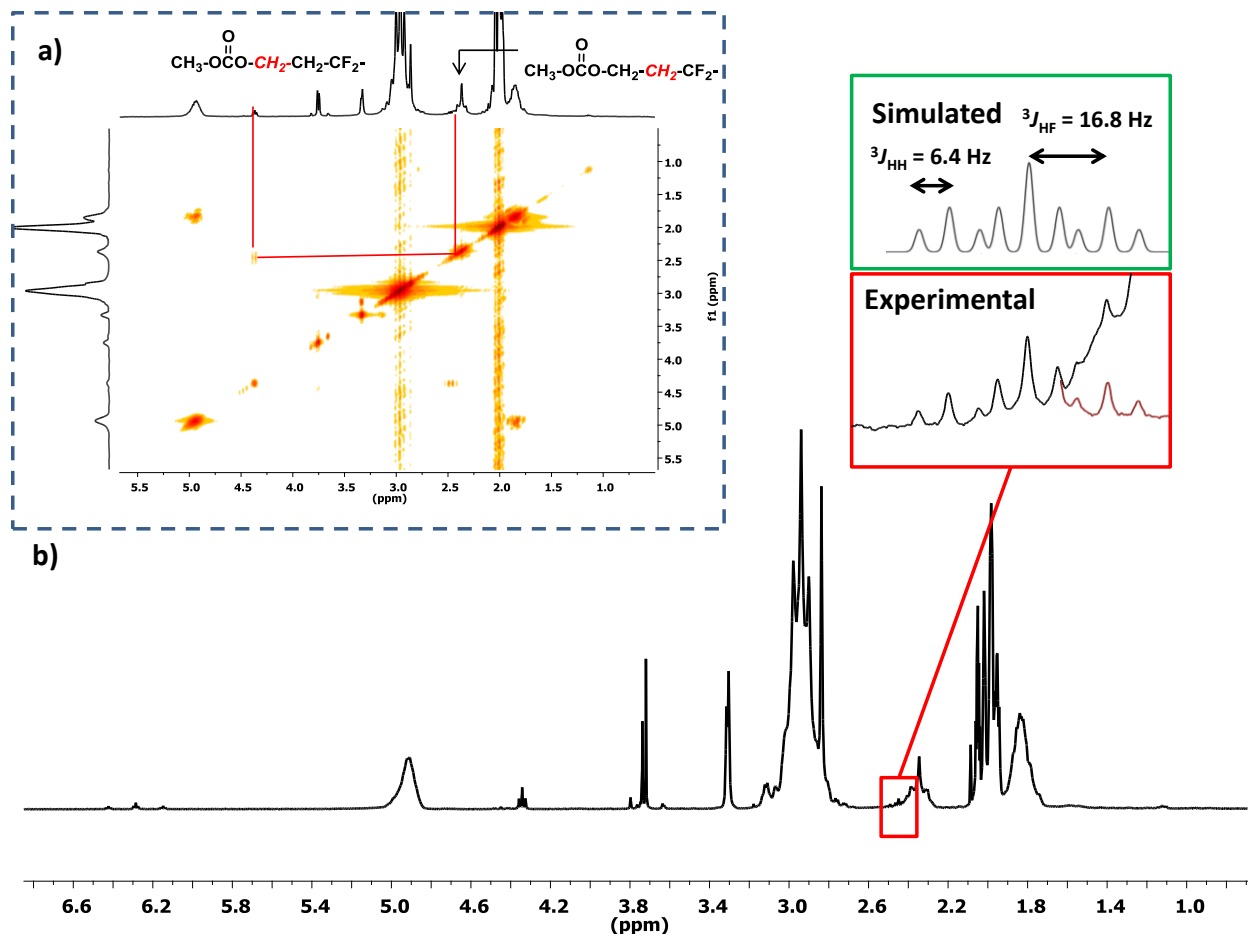

**Figure S9.** a) COSY  $^1\text{H}$ - $^1\text{H}$  NMR spectrum in  $(\text{CD}_3)_2\text{CO}$  of precipitated  $\text{PVAc}_{115}\text{-}b\text{-PVDF}_{502}$  BCP (run 7, Table 1). The red lines highlight the correlation between the  $-\text{CH}_2-$  group of DMC and the  $\text{CH}_2$  of the first added VDF unit in PVDF chains initiated by DMC b)  $^1\text{H}$  NMR spectrum in  $(\text{CD}_3)_2\text{CO}$  of precipitated  $\text{PVAc}_{115}\text{-}b\text{-PVDF}$  BCP (run 7, Table 1). The expansion of the signals at 2.35-2.55 ppm (red box) shows the experimental pattern (with the expected symmetry drawn in red) of  $(\text{CH}_3\text{OC}(\text{O})\text{-O-CH}_2\text{-CH}_2\text{-CF}_2\text{-}$  protons and the associated simulated pattern.

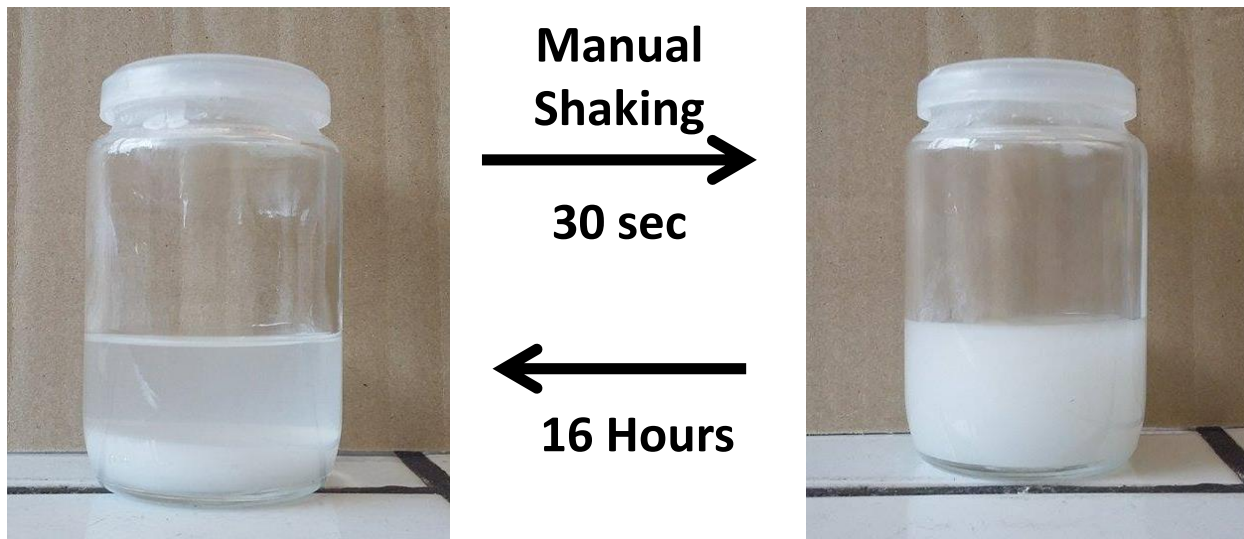

**Figure S10.** Macroscopic aspect of PVAc<sub>18</sub>-*b*-PVDF<sub>257</sub> dispersion in DMC (run 5) before and after shaking.

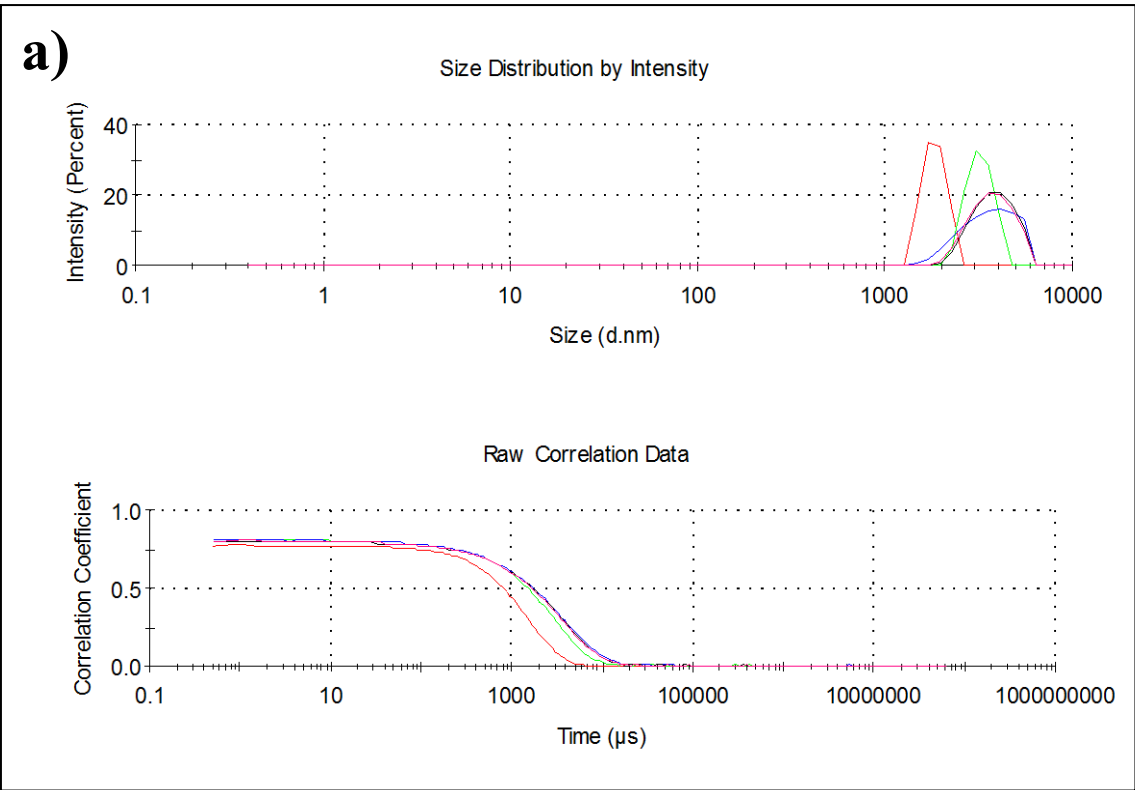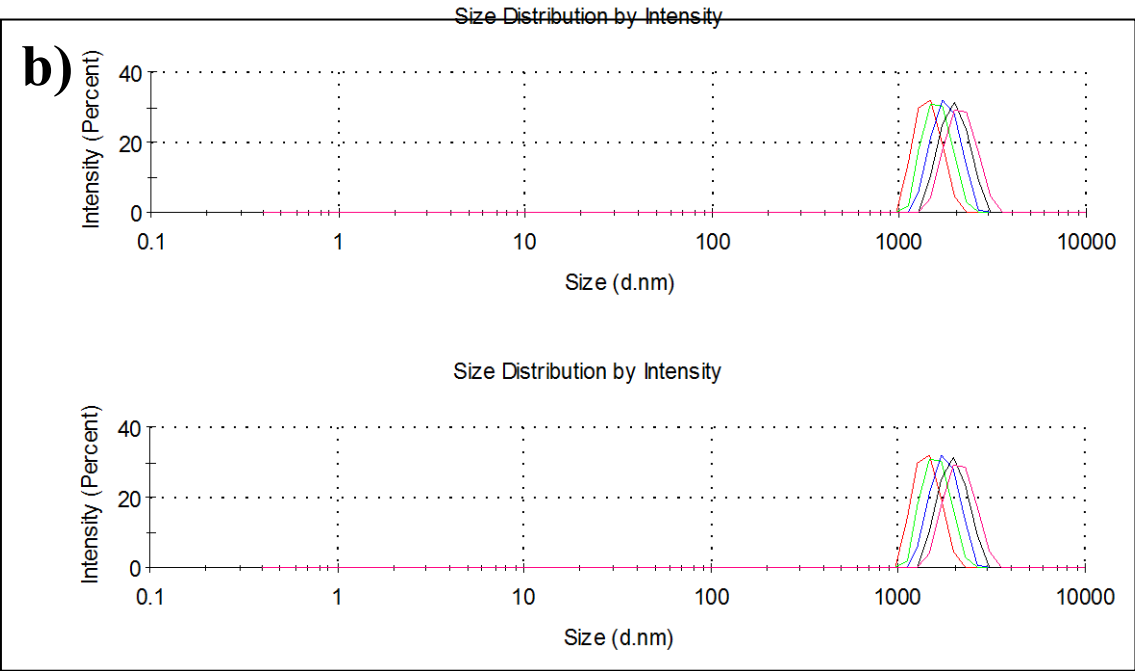

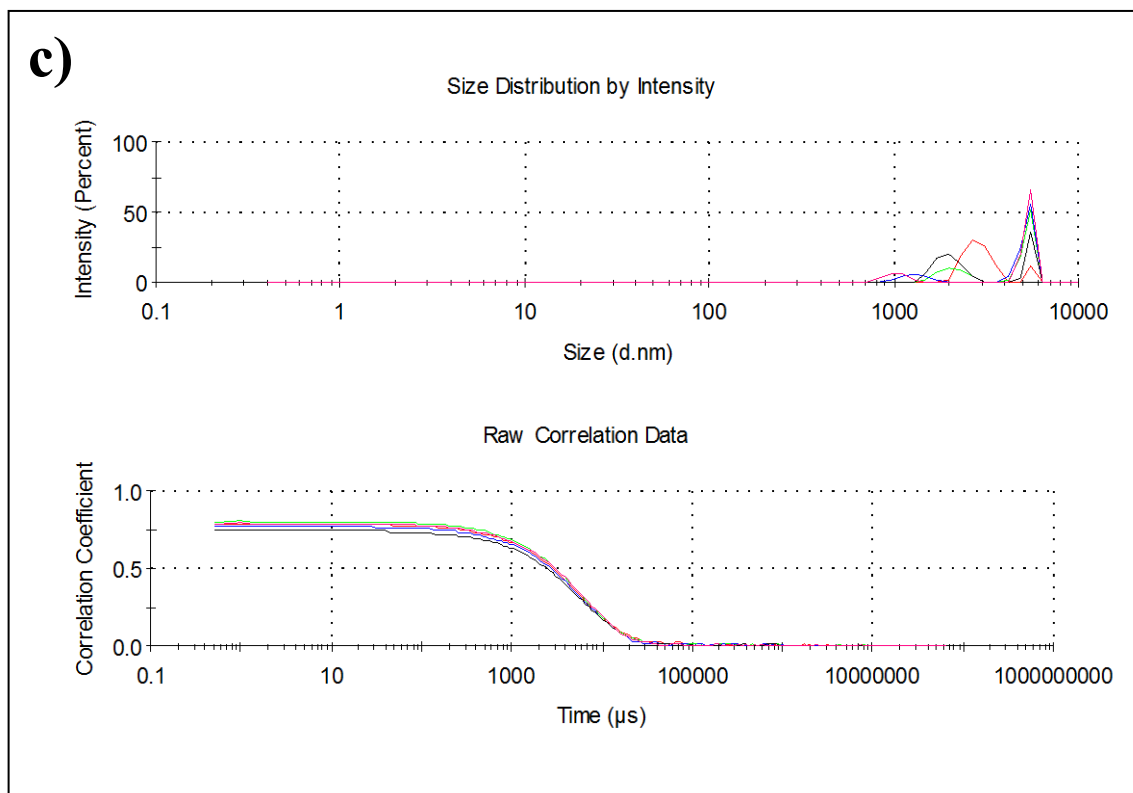

**Figure S11.** Intensity-average diameter distribution and correlation curve of: a) PVAc<sub>18</sub>-*b*-PVDF<sub>18</sub> (run 2, Table 1), b) PVAc<sub>18</sub>-*b*-PVDF<sub>257</sub> (run 5, Table 1) and c) PVAc<sub>96</sub>-*b*-PVDF<sub>205</sub> (run 9, Table 1) BCPs dispersed in dimethylcarbonate at 1 wt. %.

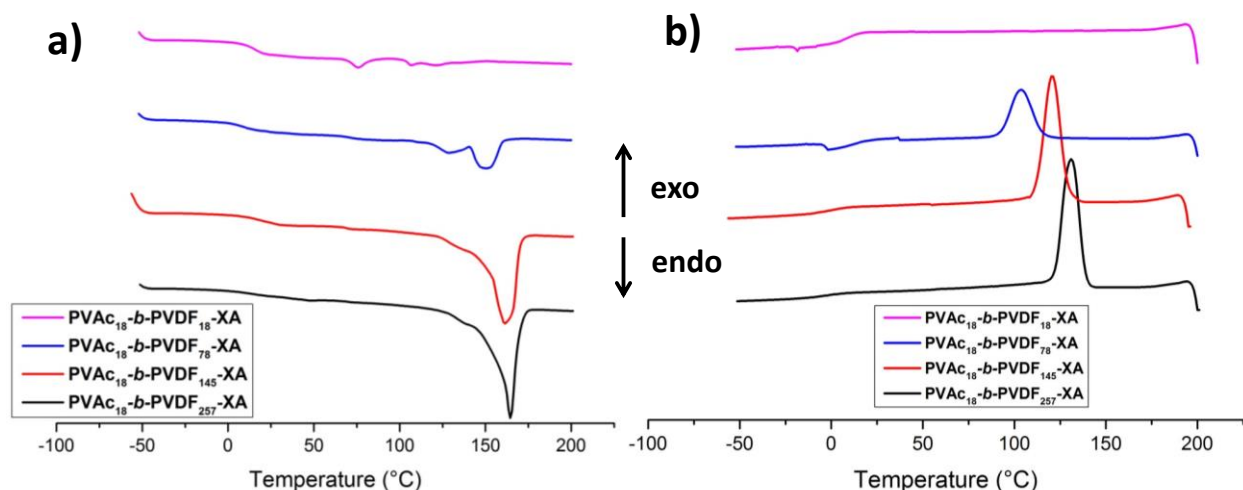

**Figure S12.** DSC thermograms first heating a) followed by cooling b) of PVAc-*b*-PVDF dried dispersions: PVAc<sub>18</sub>-*b*-PVDF<sub>257</sub> (black), PVAc<sub>18</sub>-*b*-PVDF<sub>145</sub> (red) PVAc<sub>18</sub>-*b*-PVDF<sub>78</sub> (blue) and PVAc<sub>18</sub>-*b*-PVDF<sub>18</sub> (pink).

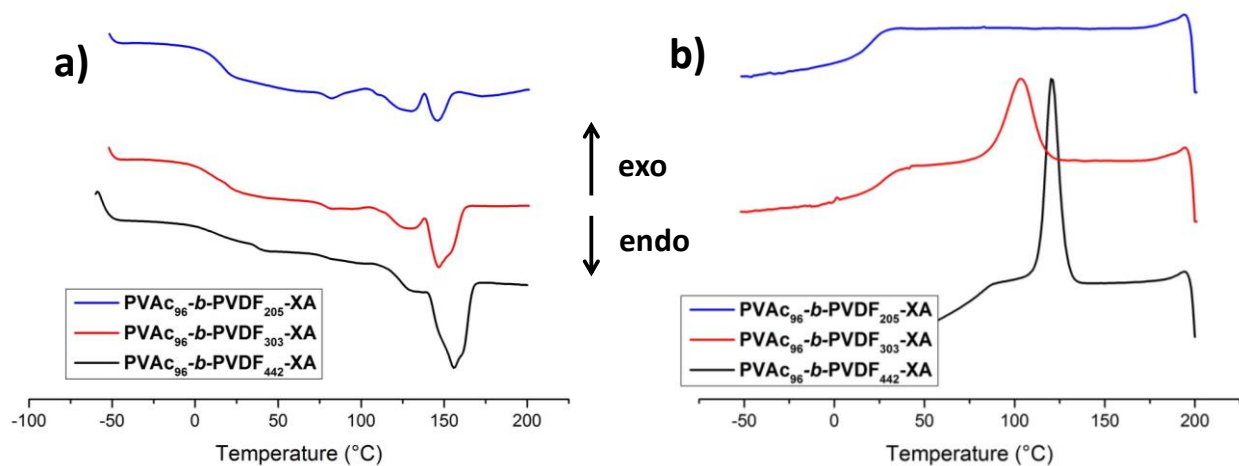

**Figure S13.** DSC thermograms first heating a) followed by cooling b) of PVAc-*b*-PVDF dried dispersion: PVAc<sub>96</sub>-*b*-PVDF<sub>442</sub> (black), PVAc<sub>96</sub>-*b*-PVDF<sub>303</sub> (red) and PVAc<sub>18</sub>-*b*-PVDF<sub>205</sub> (blue).



| Run | X <sub>c</sub> (%) | PVAc <sub>x</sub> -b-PVDF <sub>y</sub><br>X/Y | wt. %<br>(PVAc/PVDF)<br>crude |
|-----|--------------------|-----------------------------------------------|-------------------------------|
| 2   | 33                 | 18/18                                         | 85/15                         |
| 3   | 45                 | 18/78                                         | 51/49                         |
| 4   | 81                 | 18/145                                        | 31/69                         |
| 5   | 64                 | 18/257                                        | 16/84                         |
| 9   | 42                 | 96/205                                        | 74/26                         |
| 10  | 51                 | 96/303                                        | 57/43                         |
| 11  | 52                 | 96/442                                        | 36/64                         |

**Table S2.** Degree of crystallinity (X<sub>c</sub>) of the PVDF fraction in the BCPs dispersions determined using equations S9 and S10:

$$X_c(\%) = \frac{\Delta H_f}{\Delta H_f^0 \Phi_m} \times 100 \quad (S10)$$

With  $\Delta H_f^0 \Phi_m$  is a heat of fusion of 100 % crystalline PVDF (104.6 J.g<sup>-1</sup>) and  $\Phi_m$  is the weight fraction of PVDF.<sup>1,2</sup>

#### References:

1. K. Nakagawa, Y. Ishida, *J. Polym. Sci. Part B*, 1973, **11**, 2153.
2. J. N. Martins, T. S. Bassano, R. V. B. Oliveira, *Materials Science and Engineering C*, 2012, **32**, 146-151.
